# Supplementary material
Source: MDPI journal article supplement (https://www.mdpi.com/2073-4441/15/8/1446)
Supplement: s1 [file s1]

## Supplementary Materials

### S1. The estimation of fine resolution surface water map based on the MRF

$X$  can be formulated by applying the maximum a posteriori rule in Bayesian framework by solving the maximization problem:

$$\{P^{\text{posterior}}(X|Y)\} = \text{argmax} \left\{ \frac{1}{Z} \exp[-U^{\text{posterior}}(X|Y)] \right\} \quad (\text{S1})$$

where  $U^{\text{posterior}}(X|Y)$  is the posterior energy function of  $X$  given  $Y$ , and  $Z$  is a normalization constant. The optimal  $X$  can be estimated by minimizing the energy function  $U^{\text{posterior}}(X|Y)$ :

$$U^{\text{posterior}}(X|Y) = \lambda \cdot U^{\text{spatial}}(X) + U^{\text{fraction}}(Y|X) \quad (\text{S2})$$

where  $U^{\text{spatial}}(X)$  is the spatial constraint function and  $U^{\text{fraction}}(Y|X)$  is the surface water fraction constraint function that represents the inconsistency between  $Y$  and  $X$ .  $\lambda$  is a balance parameter.

The spatial constraint function is used to maximize the spatial dependence for the water class and land class. For each 2 m resolution pixel, the spatial dependence for the water (or land) pixel is calculated by a weighted sum of all water (or land) pixels within a local window using the target pixel as the window center. The spatial constraint function is calculated according to the spatial dependences of all the 2 m pixels as:

$$U^{\text{spatial}}(X) = \sum_{i=1}^I \sum_{j=1}^J \sum_{k=1}^{s^2} \left( -1 \times \sum_{l \in N(a_{ijk})} \delta(c(a_{ijk}), c(a_l)) / d(a_{ijk}, a_l) \right) \quad (\text{S3})$$

where  $I$  and  $J$  are the number of Sentinel-2 pixels,  $a_{ijk}$  is a target 2 m resolution pixel,  $N(a_{ijk})$  is a  $w \times w$  sized window with which  $a_{ijk}$  is its center,  $a_l$  is its neighborhood pixel  $N(a_{ijk})$ ,  $d(a_{ijk}, a_l)$  is the geometric distance between  $a_{ijk}$  and  $a_l$ ,  $c(a_{ijk})$  and  $c(a_l)$  are the class labels of the pixels  $a_{ijk}$  and  $a_l$ , and  $\delta(c(a_{ijk}), c(a_l))$  is the Kronecker delta function that equals 1 if  $c(a_{ijk})$  and  $c(a_l)$  are the same or 0 otherwise.

The water fraction constraint function is used to minimize the surface water fractions between the unmixed Sentinel-2 pixels and the predicted 2 m surface water map as:

$$U^{\text{fraction}}(Y|X) = \sum_{i=1}^I \sum_{j=1}^J \left( F_{ij}^{\text{unmix}} - F_{ij}^{\text{predict}} \right)^2 \quad (\text{S4})$$

where  $F_{ij}^{\text{unmix}}$  and  $F_{ij}^{\text{predict}}$  are the surface water fractions within the 10 m Sentinel-2 pixel

$(i, j)$ .  $F_{ij}^{\text{predict}}$  is calculated by dividing the total number of 2 m resolution water pixels within

the Sentinel-2 pixel  $(i, j)$  by  $s^2$ , and the value of  $F_{ij}^{\text{predict}}$  is iteratively updated.
